# Supplementary material for: Evidence for Adaptive Selection in the Mitogenome of a Mesoparasitic Monogenean Flatworm Enterogyrus malmbergi
Source: MDPI journal article supplement (doi:10.3390/genes10110863), 2019-10-30
Supplement: s1 [file s1]

AT(%)

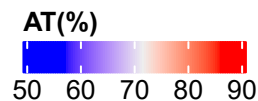

Family

- Tetraonchoiidae
- Gyrodactylidae
- Diplectanidae
- Capsalidae
- Gyrodactylidae
- Diplectanidae
- Gyrodactylidae
- Capsalidae
- Gyrodactylidae
- Microcotylidae
- Diplozoidae
- Chauhaneidae
- Microcotylidae
- Gyrodactylidae
- Dactylogyridae
- Diplozoidae
- Dactylogyridae
- Diplozoidae
- Gyrodactylidae
- Dactylogyridae
- Gyrodactylidae
- Dactylogyridae

*Paratetraonchooides inermis*  
*Gyrodactylus nyanzae*  
*Lepidotrema longipenis*  
*Neobenedenia melleni*  
*Benedenia seriola*  
*Paragyrodactylus variegatus*  
*Lamellodiscus spari*  
*Laticola paralatesi*  
*Aglaiogyrodactylus forficulatus*  
*Gyrodactylus parvae*  
*Benedenia hoshinai*  
*Gyrodactylus gurleyi*  
*Gyrodactylus kobayashii*  
*Polylabris halichoeres*  
*Eudiplozoon sp. DZ-2018*  
*Pseudochauhanea macrorchis*  
*Microcotyle sebastis*  
*Gyrodactylus derjavinoidei*  
*Dactylogyryrus lamellatus*  
*Sindiplozoon sp. DZ-2018*  
*Enterogyrus malmbergi*  
*Paradiplozoon opsariichthydis*  
*Gyrodactylus brachymystacis*  
*Euryhaliotrema johnii*  
*Tetrancistrum nebulosi*  
*Cichlidogyrus sclerosus*  
*Cichlidogyrus halli*  
*Gyrodactylus salaris*  
*Cichlidogyrus mbirizei*  
*Ancyrocephalus mogurndae*

3rd codon position  
 nad4L  
 nad6  
 nad3  
 nad2  
 rnl  
 rRNAs  
 tRNAs  
 rns  
 nad5  
 nad4  
 Full genome  
 PCGs  
 cox3  
 nad1  
 atp6  
 2nd codon position  
 cytb  
 cox1  
 cox2  
 1st codon position
